# Supplementary material for: Chemical vapor deposition derived flexible graphene paper and its application as high performance anodes for lithium rechargeable batteries
Source: Royal Society of Chemistry journal article supplement (doi:10.1039/c2ta00140c), 2012-10-08
Supplement: c2ta00140c.pdf [file c2ta00140c.pdf]

## Electronic supplementary information (ESI)

### Chemical Vapor Deposition Derived Graphene Papers: High Capacity Flexible Anodes for Lithium Rechargeable Batteries

Guoqing Ning,<sup>\*a</sup> Chenggen Xu,<sup>a</sup> Yanming Cao,<sup>a</sup> Xiao Zhu,<sup>a</sup> Zhimin Jiang,<sup>b</sup> Zhuangjun Fan,<sup>c</sup>  
Weizhong Qian,<sup>d</sup> Fei Wei<sup>d</sup> and Jinsen Gao<sup>\*a</sup>

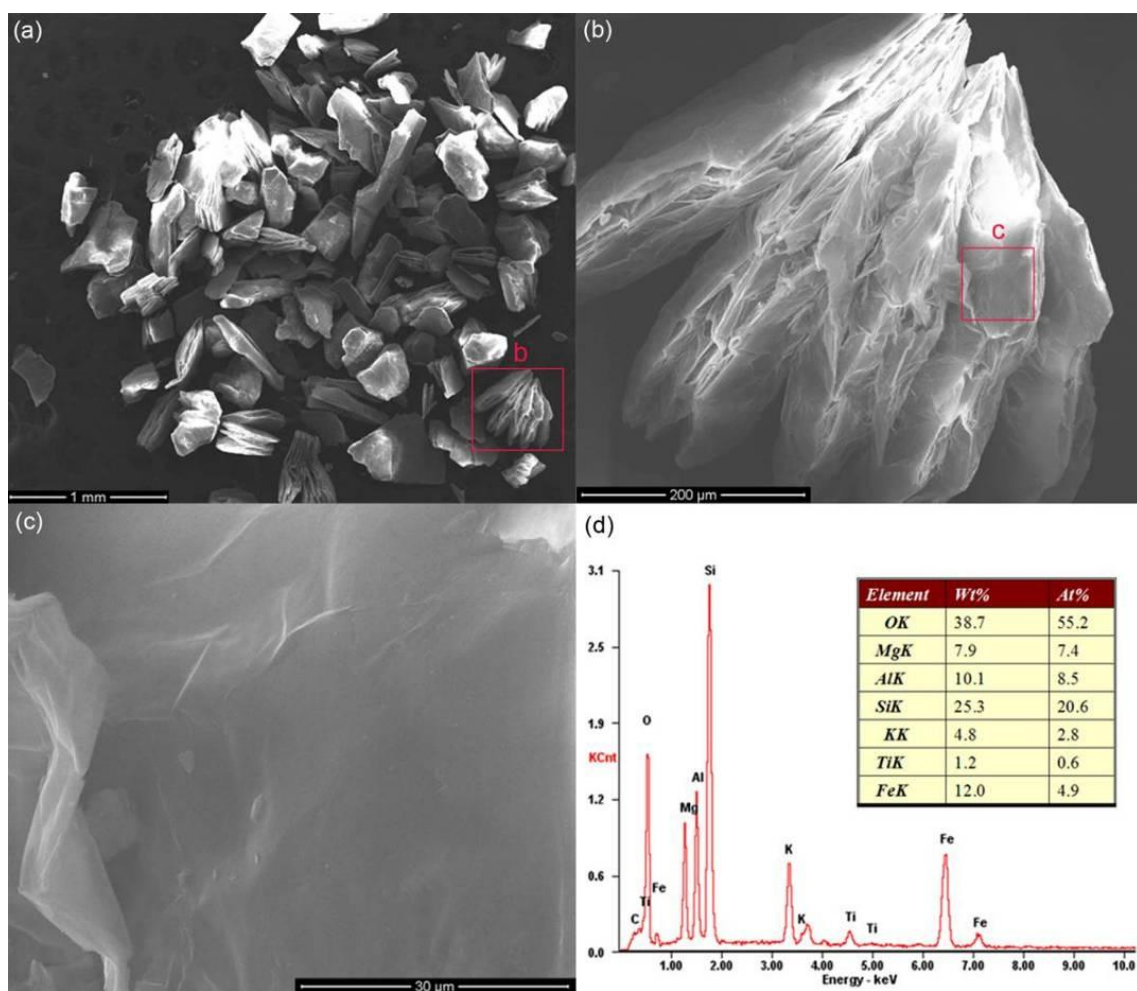

**Fig. S1** (a-c) SEM images and (d) EDS element analysis of the expanded vermiculite.

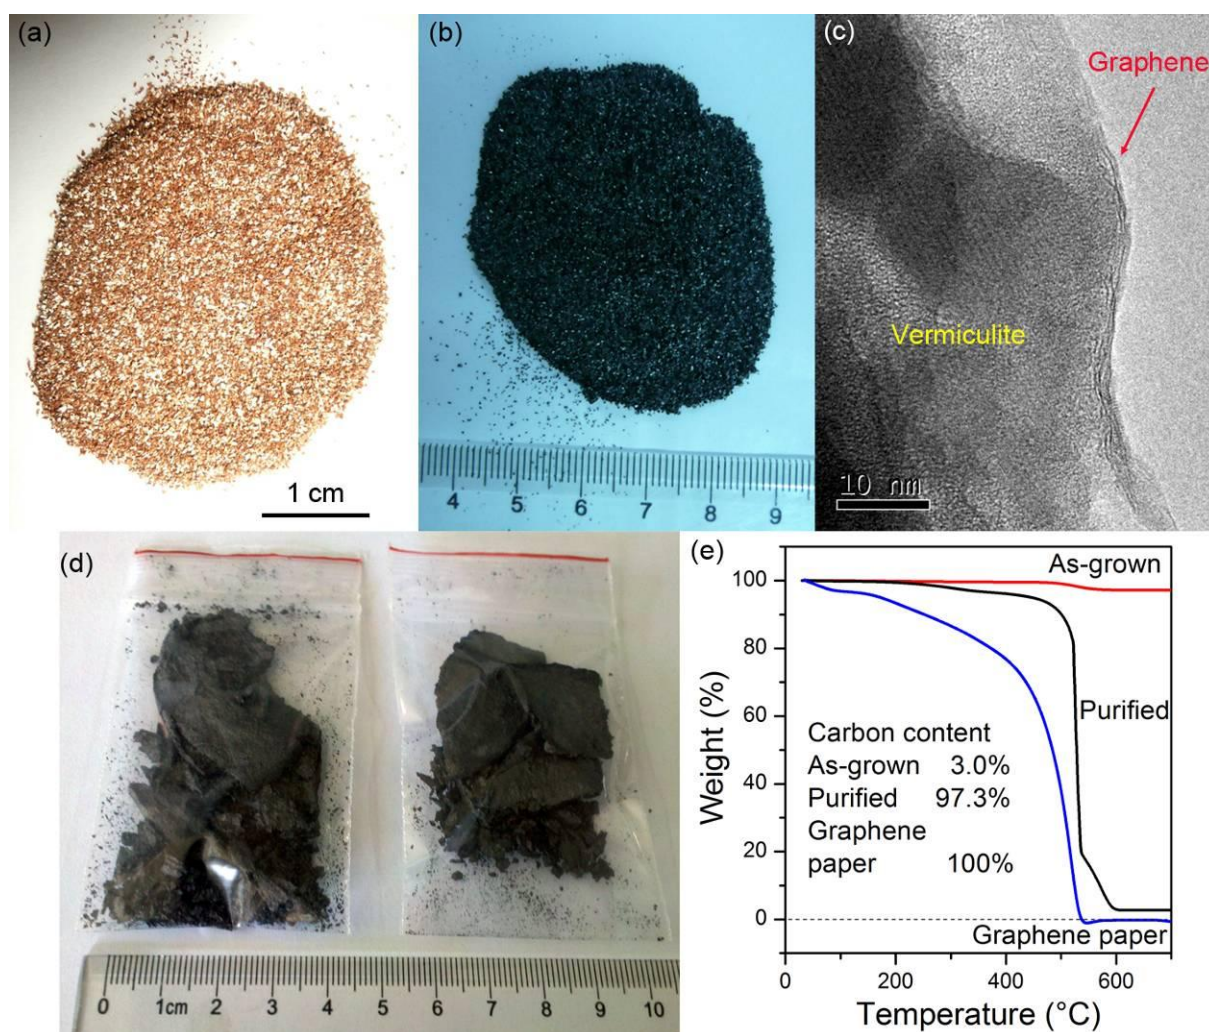

**Fig. S2** Photos of (a) the expanded vermiculite, (b) the as-prepared material before acid washing and (d) the purified graphene bulk material. (c) TEM image of the as-prepared graphene showing graphene layers deposited on vermiculite. (e) TGA curves of the graphene materials prepared by  $C_2H_4$  cracking on vermiculite templates.

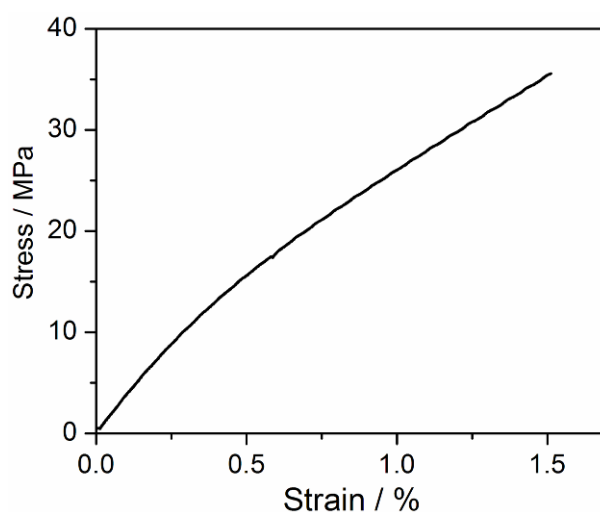

**Fig. S3** Typical tensile curve of the CVD-graphene paper.

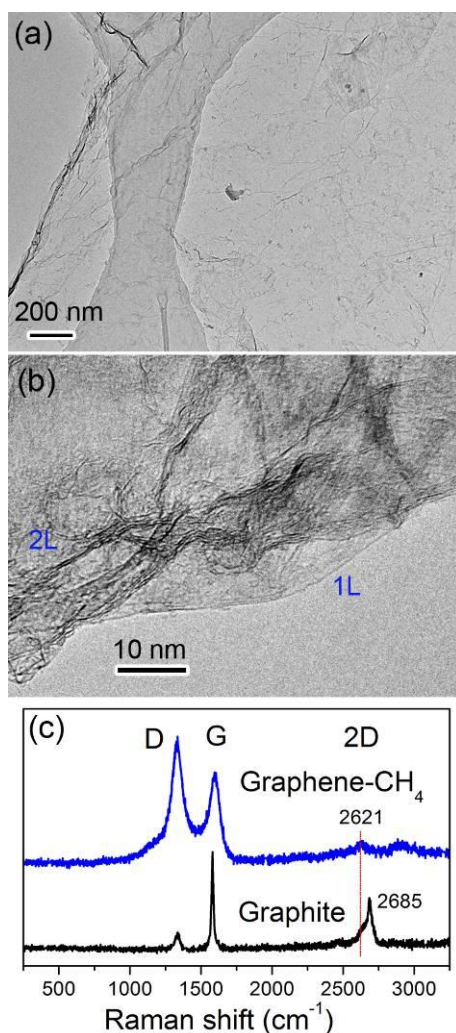

**Fig. S4** (a, b) TEM images and (c) Raman spectrum (in comparison with graphite) of the graphene prepared with expanded vermiculite using CH<sub>4</sub> as carbon source. The 2D peak of the graphene (2621 cm<sup>-1</sup>) is obviously downshifted as compared to that of graphite (2685 cm<sup>-1</sup>), indicating that the graphene has only one to two graphene layers, well consistent with the TEM observation.

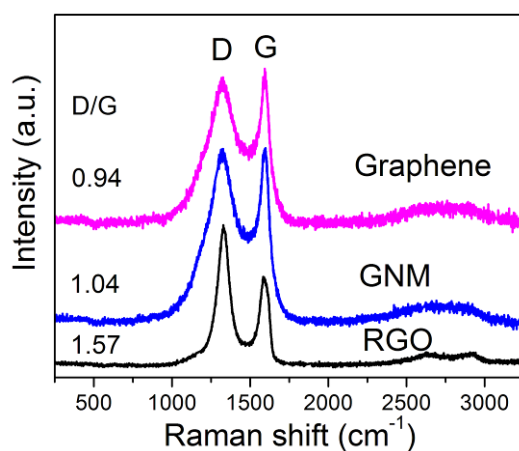

**Fig. S5** Raman spectra of the graphene and the GNM (prepared using C<sub>2</sub>H<sub>4</sub> as carbon source) in comparison with that of rGO.

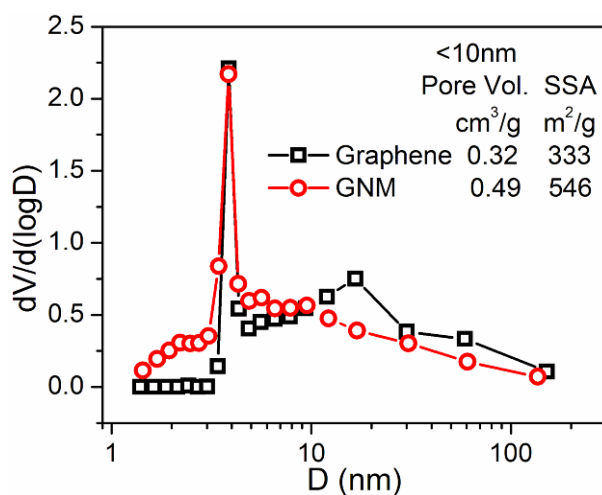

**Fig. S6** Pore size distributions of the graphene and the GNM.

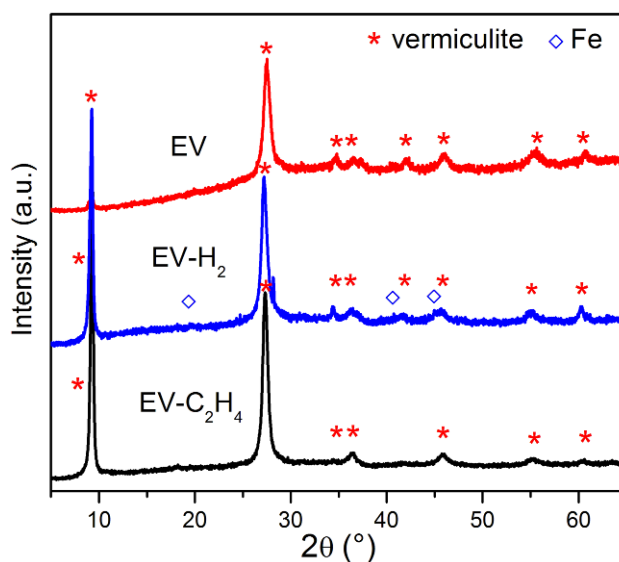

**Fig. S7** XRD patterns of the untreated expanded vermiculite (EV), the H<sub>2</sub>-reduced expanded vermiculite (EV-H<sub>2</sub>) and the expanded vermiculite after carbon deposition (EV-C<sub>2</sub>H<sub>4</sub>).



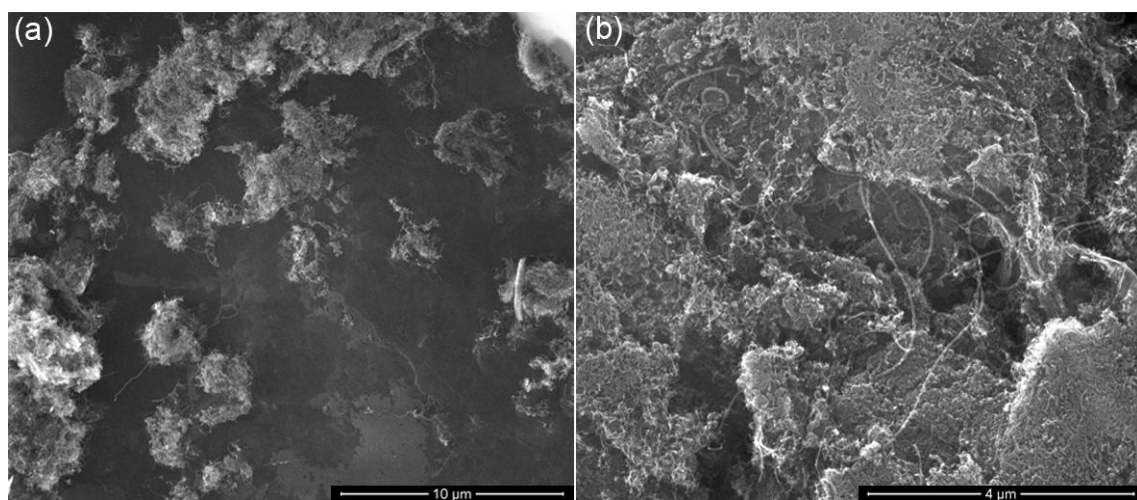

**Fig. S8** SEM images of the materials prepared with a H<sub>2</sub> to C<sub>2</sub>H<sub>4</sub> ratio of 1:2 before (a) and after purification (b).
